# Supplementary material
Source: PubMed Central journal article supplement (PMC6279591)
Supplement: NIHMS1506108-supplement-1.pdf [file NIHMS1506108-supplement-1.pdf]

**Supplementary Material**

**Healthy Lifestyle Factors Associated With Lower Risk of Colorectal Cancer Irrespective of Genetic Risk**

Prudence R Carr, Korbinian Weigl, Lina Jansen, Viola Walter, Vanessa Erben, Jenny Chang-Claude, Hermann Brenner, Michael Hoffmeister

**Supplementary Table 1.** Composition and points of the diet quality score, based on responses from the DACHS study food frequency questionnaire. The diet quality score ranged from 0 (lowest) to 50 (highest).

| <b>Food groups</b>                        | <b>Food frequency questionnaire responses</b> |                     |                                |                      |                                |              | <b>Total Max.</b> |
|-------------------------------------------|-----------------------------------------------|---------------------|--------------------------------|----------------------|--------------------------------|--------------|-------------------|
|                                           | <i>Multiple times per day</i>                 | <i>Once per day</i> | <i>Multiple times per week</i> | <i>Once per week</i> | <i>Less than once per week</i> | <i>Never</i> |                   |
| <i>Red and processed meat<sup>1</sup></i> | 0                                             | 1                   | 2                              | 3                    | 4                              | 5            | 5                 |
| <i>Fish</i>                               | 5                                             | 4                   | 3                              | 2                    | 1                              | 0            | 5                 |
| <i>Wholegrains<sup>2</sup></i>            | 10                                            | 8                   | 6                              | 4                    | 2                              | 0            | 10                |
| <i>Dairy foods<sup>3</sup></i>            | 10                                            | 8                   | 6                              | 4                    | 2                              | 0            | 10                |
| <i>Fruit</i>                              | 10                                            | 8                   | 6                              | 4                    | 2                              | 0            | 10                |
| <i>Vegetables/salad</i>                   | 10                                            | 8                   | 6                              | 4                    | 2                              | 0            | 10                |
|                                           |                                               |                     |                                |                      |                                |              | 50                |

<sup>1</sup> Red and processed meat: fresh pork, beef etc., sausages made from beef or pork, luncheon meats (e.g. salami/sliced sausage) and ham.

<sup>2</sup> Wholegrains and wholegrain products: e.g. wholegrain bread, muesli, other wholegrain products

<sup>3</sup> Dairy foods: cheese or quark, yoghurt, milk

**Supplementary Table 2.** Description and prevalence of the lifestyle factors in the DACHS study population.

| Lifestyle factor         | Points | Description                                                      | Prevalence in the DACHS study population |              |             |            |              |             |
|--------------------------|--------|------------------------------------------------------------------|------------------------------------------|--------------|-------------|------------|--------------|-------------|
|                          |        |                                                                  | Cases                                    |              |             | Controls   |              |             |
|                          |        |                                                                  | Male n (%)                               | Female n (%) | Total n (%) | Male n (%) | Female n (%) | Total n (%) |
| <b>Smoking</b>           | 0      | Smoking: current smoker or former smoker ( $\geq 30$ pack years) | 691 (28)                                 | 256 (16)     | 947 (23)    | 398 (22)   | 148 (13)     | 546 (18)    |
|                          | 1      | Non-smoking: never smoker or former smoker ( $< 30$ pack years)  | 1795 (72)                                | 1350 (84)    | 3145 (77)   | 1448 (78)  | 1038 (87)    | 2486 (82)   |
| <b>Alcohol intake</b>    | 0      | Did not meet recommendations on alcoholic drinks <sup>1</sup>    | 997 (40)                                 | 230 (14)     | 1227 (30)   | 608 (33)   | 202 (17)     | 810 (27)    |
|                          | 1      | Met recommendation on alcoholic drinks <sup>1</sup>              | 1489 (60)                                | 1376 (86)    | 2865 (70)   | 1238 (67)  | 984 (83)     | 2222 (73)   |
| <b>Diet quality</b>      | 0      | Unhealthy diet quality: diet score $< 34$ <sup>2</sup>           | 1751 (70)                                | 913 (57)     | 2664 (65)   | 1113 (60)  | 510 (43)     | 1623 (54)   |
|                          | 1      | Healthy diet quality: diet score $\geq 34$ <sup>2</sup>          | 735 (30)                                 | 693 (43)     | 1428 (35)   | 733 (40)   | 676 (57)     | 1409 (46)   |
| <b>Physical activity</b> | 0      | Did not meet physical activity guidelines <sup>3</sup>           | 385 (15)                                 | 260 (16)     | 645 (16)    | 214 (12)   | 140 (12)     | 354 (12)    |
|                          | 1      | Met physical activity guidelines <sup>3</sup>                    | 2101 (85)                                | 1346 (84)    | 3447 (84)   | 1632 (88)  | 1046 (88)    | 2678 (88)   |
| <b>Body Mass Index</b>   | 0      | Overweight or obese (BMI $\geq 25\text{kg/m}^2$ )                | 1874 (75)                                | 967 (60)     | 2841 (69)   | 1264 (69)  | 601 (51)     | 1865 (61)   |
|                          | 1      | Healthy weight (18.5 $<$ BMI $< 25\text{kg/m}^2$ )               | 612 (25)                                 | 639 (40)     | 1251 (31)   | 582 (31)   | 585 (49)     | 1167 (39)   |

<sup>1</sup>World Cancer Research Fund/American Institute for Cancer Research (WCRF/AICR) (2007) Recommendation on alcoholic drinks:  $\leq 24\text{g/day}$  men,  $\leq 12\text{g/day}$  women

<sup>2</sup>Diet score in the highest 40%

<sup>3</sup>The WHO Global Recommendations on Physical Activity for Health (2010) recommend adults to engage in at least 150 minutes of moderate-intensity or 75 minutes of vigorous-intensity aerobic physical activity throughout the week or an equivalent combination of moderate and vigorous intensity physical activity (At least  $\sim 500$  MET minutes)

**Supplementary Table 3.** Association between the healthy lifestyle score and colorectal cancer in the DACHS study by history of colonoscopy, use of NSAIDs, family history of CRC, age, and CRC stage.

|                               | Lifestyle factors             | Colorectal cancer                                |                          | P <sub>interaction</sub> |             |      |
|-------------------------------|-------------------------------|--------------------------------------------------|--------------------------|--------------------------|-------------|------|
|                               |                               | n <sub>cases</sub> (%)/n <sub>controls</sub> (%) | OR (95% CI) <sup>†</sup> |                          |             |      |
| <b>History of colonoscopy</b> |                               |                                                  |                          |                          |             |      |
| Yes                           | 0 or 1                        | 51(7)/71(5)                                      | 1.00 (Ref.)              | 0.06                     |             |      |
|                               | 2                             | 153(21)/255(17)                                  | 0.84 (0.55-1.27)         |                          |             |      |
|                               | 3                             | 254(35)/523(35)                                  | 0.64 (0.43-0.95)         |                          |             |      |
|                               | 4                             | 213(29)/423(29)                                  | 0.64 (0.43-0.97)         |                          |             |      |
|                               | 5                             | 63(9)/206(14)                                    | 0.40 (0.25-0.65)         |                          |             |      |
|                               | Per 1 point increase in score |                                                  | 0.83 (0.76-0.91)         |                          |             |      |
|                               | P trend                       |                                                  | 0.0001                   |                          |             |      |
|                               | No                            | 0 or 1                                           | 315 (9)/90(6)            |                          | 1.00 (Ref.) |      |
| No                            | 2                             | 825(25)/264(17)                                  | 0.86 (0.65-1.14)         |                          |             |      |
|                               | 3                             | 1159 (35)/524(34)                                | 0.61 (0.47-0.79)         |                          |             |      |
|                               | 4                             | 814(24)/466(30)                                  | 0.48 (0.37-0.63)         |                          |             |      |
|                               | 5                             | 230 (7)/207(13)                                  | 0.31 (0.23-0.43)         |                          |             |      |
|                               | Per 1 point increase in score |                                                  | 0.74 (0.70-0.79)         |                          |             |      |
|                               | P trend                       |                                                  | <0.0001                  |                          |             |      |
|                               | <b>Regular use of NSAIDs</b>  |                                                  |                          |                          |             |      |
|                               | Yes                           | 0 or 1                                           | 113(11)/67(7)            |                          | 1.00 (Ref.) | 0.80 |
| 2                             |                               | 260(26)/173(18)                                  | 0.93 (0.63-1.35)         |                          |             |      |
| 3                             |                               | 377(37)/353(37)                                  | 0.65 (0.46-0.94)         |                          |             |      |
| 4                             |                               | 215(21)/268(28)                                  | 0.50 (0.34-0.73)         |                          |             |      |
| 5                             |                               | 52(5)/89(9)                                      | 0.37 (0.22-0.60)         |                          |             |      |
| Per 1 point increase in score |                               |                                                  | 0.76 (0.69-0.84)         |                          |             |      |
| P trend                       |                               |                                                  | <0.0001                  |                          |             |      |
| No                            |                               | 0 or 1                                           | 244(8)/91(5)             | 1.00 (Ref.)              |             |      |
| No                            | 2                             | 711(24)/377(16)                                  | 0.81 (0.61-1.08)         |                          |             |      |
|                               | 3                             | 1017(34)/686(34)                                 | 0.60 (0.45-0.79)         |                          |             |      |
|                               | 4                             | 801(27)/611(30)                                  | 0.53 (0.40-0.71)         |                          |             |      |
|                               | 5                             | 236(8)/320(16)                                   | 0.32 (0.24-0.45)         |                          |             |      |
|                               | Per 1 point increase in score |                                                  | 0.78 (0.73-0.82)         |                          |             |      |
|                               | P trend                       |                                                  | <0.0001                  |                          |             |      |
|                               | <b>Family history of CRC</b>  |                                                  |                          |                          |             |      |
|                               | Yes                           | 0 or 1                                           | 49(8)/9(3)               | 1.00 (Ref.)              |             |      |
| 2                             |                               | 148(25)/49(15)                                   | 0.68 (0.30-1.53)         |                          |             |      |
| 3                             |                               | 225(38)/112(34)                                  | 0.44 (0.20-0.97)         |                          |             |      |
| 4                             |                               | 137(23)/115(35)                                  | 0.29 (0.13-0.64)         |                          |             |      |
| 5                             |                               | 37(6)/46(14)                                     | 0.19 (0.08-0.47)         |                          |             |      |
| Per 1 point increase in score |                               |                                                  | 0.66 (0.56-0.77)         |                          |             |      |
| P trend                       |                               |                                                  | <0.0001                  |                          |             |      |

(Continued next page)

|                               | Lifestyle factors             | Colorectal cancer                                |                          | P <sub>interaction</sub> |
|-------------------------------|-------------------------------|--------------------------------------------------|--------------------------|--------------------------|
|                               |                               | n <sub>cases</sub> (%)/n <sub>controls</sub> (%) | OR (95% CI) <sup>1</sup> |                          |
| No                            | 0 or 1                        | 317 (9)/152(6)                                   | 1.00 (Ref.)              | 0.16                     |
|                               | 2                             | 835(24)/470(17)                                  | 0.85 (0.67-1.08)         |                          |
|                               | 3                             | 1190(34)/933(35)                                 | 0.63 (0.50-0.79)         |                          |
|                               | 4                             | 894(26)/775(29)                                  | 0.56 (0.44-0.71)         |                          |
|                               | 5                             | 257(7)/368(14)                                   | 0.35 (0.27-0.46)         |                          |
|                               | Per 1 point increase in score |                                                  | 0.79 (0.74-0.83)         |                          |
|                               | P trend                       |                                                  | <0.0001                  |                          |
|                               | <b>Age</b>                    |                                                  |                          |                          |
| <70                           | 0 or 1                        | 207(10)/84(5)                                    | 1.00 (Ref.)              | 0.07                     |
|                               | 2                             | 529(25)/271(17)                                  | 0.85 (0.62-1.16)         |                          |
|                               | 3                             | 683(33)/556(36)                                  | 0.54 (0.40-0.72)         |                          |
|                               | 4                             | 513(24)/440(28)                                  | 0.50 (0.37-0.68)         |                          |
|                               | 5                             | 163(8)/207(13)                                   | 0.37 (0.26-0.53)         |                          |
|                               | Per 1 point increase in score |                                                  | 0.78 (0.72-0.83)         |                          |
|                               | P trend                       |                                                  | <0.0001                  |                          |
|                               | ≥70                           | 0 or 1                                           | 159(8)/77(5)             |                          |
| 2                             |                               | 454(23)/248(17)                                  | 0.84 (0.60-1.17)         |                          |
| 3                             |                               | 734(37)/491(33)                                  | 0.71 (0.52-0.98)         |                          |
| 4                             |                               | 518(26)/451(31)                                  | 0.57 (0.41-0.79)         |                          |
| 5                             |                               | 132(7)/207(14)                                   | 0.30 (0.21-0.45)         |                          |
| Per 1 point increase in score |                               |                                                  | 0.77 (0.71-0.82)         |                          |
| P trend                       |                               |                                                  | <0.0001                  |                          |
| <b>CRC Stage</b>              |                               |                                                  |                          |                          |
| I                             | 0 or 1                        | 63(7)/161(5)                                     | 1.00 (Ref.)              | 0.07                     |
|                               | 2                             | 220 (23)/519(17)                                 | 1.12 (0.80-1.59)         |                          |
|                               | 3                             | 346(37)/1047(35)                                 | 0.86 (0.62-1.20)         |                          |
|                               | 4                             | 245(26)/891(29)                                  | 0.72 (0.51-1.02)         |                          |
|                               | 5                             | 73(8)/414(14)                                    | 0.48 (0.32-0.72)         |                          |
|                               | Per 1 point increase in score |                                                  | 0.81 (0.75-0.87)         |                          |
|                               | P trend                       |                                                  | <0.0001                  |                          |
|                               | II                            | 0 or 1                                           | 137(11)/161(5)           |                          |
| 2                             |                               | 321(26)/519(17)                                  | 0.72 (0.54-0.96)         |                          |
| 3                             |                               | 442(35)/1047(35)                                 | 0.48 (0.37-0.63)         |                          |
| 4                             |                               | 276(22)/891(29)                                  | 0.35 (0.26-0.46)         |                          |
| 5                             |                               | 81(6)/414(14)                                    | 0.23 (0.16-0.33)         |                          |
| Per 1 point increase in score |                               |                                                  | 0.69 (0.65-0.75)         |                          |
| P trend                       |                               |                                                  | <0.0001                  |                          |

(Continued next page)

|     | Lifestyle factors             | Colorectal cancer                                |                          | P <sub>interaction</sub> |
|-----|-------------------------------|--------------------------------------------------|--------------------------|--------------------------|
|     |                               | n <sub>cases</sub> (%)/n <sub>controls</sub> (%) | OR (95% CI) <sup>1</sup> |                          |
| III | 0 or 1                        | 100(8)/161(5)                                    | 1.00 (Ref.)              |                          |
|     | 2                             | 296(23)/519(17)                                  | 0.93 (0.68-1.26)         |                          |
|     | 3                             | 437(34)/1047(35)                                 | 0.70 (0.52-0.93)         |                          |
|     | 4                             | 354(27)/891(29)                                  | 0.63 (0.46-0.85)         |                          |
|     | 5                             | 108 (8)/414(14)                                  | 0.42 (0.29-0.60)         |                          |
|     | Per 1 point increase in score |                                                  | 0.81 (0.76-0.87)         |                          |
|     | P trend                       |                                                  | <0.0001                  |                          |
| IV  | 0 or 1                        | 65 (11)/161(5)                                   | 1.00 (Ref.)              |                          |
|     | 2                             | 144 (25)/519(17)                                 | 0.72 (0.50-1.04)         |                          |
|     | 3                             | 183 (32)/1047(35)                                | 0.48 (0.33-0.68)         |                          |
|     | 4                             | 152 (26)/891(29)                                 | 0.45 (0.31-0.66)         |                          |
|     | 5                             | 33 (6)/414(14)                                   | 0.21 (0.13-0.35)         |                          |
|     | Per 1 point increase in score |                                                  | 0.73 (0.66-0.80)         |                          |
|     | P trend                       |                                                  | <0.0001                  |                          |

<sup>1</sup>Adjusted for matching factors age and sex; and the factors school education, family history of CRC, history of colonoscopy, participation in a health check-up, ever regular use of NSAIDs

Abbreviations: CI: confidence intervals; CRC: colorectal cancer; NSAIDs: non-steroidal anti-inflammatory drugs; OR: odds ratio; Ref.: Reference.

**Supplementary Table 4.** Association between combinations of the healthy lifestyle factors (prevalence >5%) and risk of colorectal cancer in the DACHS study

| Number of lifestyle factors | SMK | ALCO | DIET | PA | BMI | Prevalence (controls)<br>N (%) | Colorectal cancer        |                          |
|-----------------------------|-----|------|------|----|-----|--------------------------------|--------------------------|--------------------------|
|                             |     |      |      |    |     |                                | OR (95% CI) <sup>1</sup> | OR (95% CI) <sup>2</sup> |
| <b>0 or 1</b>               |     |      |      |    |     | 161 (5.3%)                     | 1.00 (Ref.)              | 1.00 (ref.)              |
| <b>2</b>                    |     |      |      |    |     | 213 (7.0%)                     | 0.76 (0.59-0.98)         | 0.87 (0.67-1.14)         |
| <b>3</b>                    |     |      |      |    |     | 521 (17.2%)                    | 0.64 (0.52-0.80)         | 0.69 (0.55-0.87)         |
|                             |     |      |      |    |     | 153 (5.0%)                     | 0.43 (0.32-0.58)         | 0.51 (0.37-0.69)         |
| <b>4</b>                    |     |      |      |    |     | 269 (8.9%)                     | 0.51 (0.40-0.66)         | 0.53 (0.41-0.69)         |
|                             |     |      |      |    |     | 481 (15.9%)                    | 0.45 (0.36-0.57)         | 0.52 (0.41-0.66)         |
| <b>5</b>                    |     |      |      |    |     | 414 (13.7%)                    | 0.28 (0.22-0.36)         | 0.33 (0.26-0.43)         |

<sup>1</sup>Model 1 adjusted for matching factors age and sex

<sup>2</sup>Model 2 adjusted for matching factors age and sex; and the factors school education, family history of CRC, history of colonoscopy, participation in a health check-up, ever regular use of NSAIDs

Abbreviations: ALCO: alcohol; CI: confidence intervals; OR: odds ratio; PA: physical activity; Ref.: Reference; SMK: smoking.
